# Supplementary material for: A new western Canadian record of Epeoloides pilosulus (Cresson), with discussion of ecological associations, distribution and conservation status in Canada
Source: Biodivers Data J. 2018 Apr 13;(6):e22837. doi: 10.3897/BDJ.6.e22837 (PMC5911681; doi:10.3897/BDJ.6.e22837)
Supplement: Supplementary material 1 — Specimens of Macropis bees from Canada used for map generation [file bdj-06-e22837-s001.xls]

## Sheet: Sheet1
Genus	Species	Province	Location	Lat	Long	Day	Month	Year	Collector	Sex	Notes	Collected On?	Det				GUI
Macropis	nuda	Alberta	Red Deer R. at Hwy 876 (W of Dinosaur Prov. Pk.)	52.277	-113.852	5-6	July	1989	J.H. O'Hara MT	m			C. Sheffield 2008		www.beesofcanada.com	CNC
Macropis	nuda	British Columbia	Agassiz	49.277	-121.763	8	July	1914	F.W.L. Sladen	f			R.R. Snelling		www.beesofcanada.com	CNC
Macropis	nuda	British Columbia	Agassiz	49.277	-121.763	8	July	1914	F.W.L. Sladen	m			R.R. Snelling		www.beesofcanada.com	CNC
Macropis	nuda	British Columbia	Agassiz	49.277	-121.763	8	July	1914	F.W.L. Sladen	m			R.R. Snelling		www.beesofcanada.com	CNC
Macropis	nuda	Manitoba	Aweme	49.7086	-99.6028	23	July	1915	N. Criddle	f			R.R. Snelling		www.beesofcanada.com	CNC
Macropis	nuda	Manitoba	Aweme	49.7086	-99.6028	6	July	1925	R.D. Bird	m			R.R. Snelling		www.beesofcanada.com	CNC
Macropis	nuda	Manitoba	Aweme	49.7086	-99.6028	13	July	1916	F.W.L. Sladen	m			R.R. Snelling		www.beesofcanada.com	CNC
Macropis	nuda	Manitoba	Beulah.	50.2599	-101.038	13	July	1927	E. & S. Criddle	m			R.R. Snelling		www.beesofcanada.com	CNC
Macropis	nuda	Manitoba	Emerson	49.0006	-97.2157	19	July	1916	F.W.L. Sladen	m		Old Det: Steironema	R.R. Snelling		www.beesofcanada.com	CNC
Macropis	nuda	Manitoba	Emerson	49.0006	-97.2157	20	July	1916	F.W.L. Sladen	m		Old Det: Steironema	R.R. Snelling		www.beesofcanada.com	CNC
Macropis	nuda	Manitoba	Riding Mtn Nat. Park, 6km E Clear Lake	50.6725	-99.891	23	July	1979	B. Lyons	m		malaise trap	C. Sheffield 2008		www.beesofcanada.com	CNC
Macropis	nuda	Manitoba	Shell River	51.341	-101.378	12	July	1927	E. & S. Criddle	m			R.R. Snelling		www.beesofcanada.com	CNC
Macropis	nuda	Manitoba	Shell River	51.341	-101.378	12	July	1927	E. & S. Criddle	m			R.R. Snelling		www.beesofcanada.com	CNC
Macropis	nuda	Manitoba	Teulon	50.3889	-97.2526	24	July	1922	?	m			R.R. Snelling		www.beesofcanada.com	CNC
Macropis	nuda	Manitoba	Teulon	50.3889	-97.2526	24	July	1922	?	m			C. Sheffield 2008		www.beesofcanada.com	CNC
Macropis	nuda	New Brunswick	Fredericton	45.9592	-66.6404	7	August	1914	F.W.L. Sladen	f			R.R. Snelling		www.beesofcanada.com	CNC
Macropis	nuda	New Brunswick	Kouchibouguac N.P.	46.8065	-64.9654	23	July	1977	G.A. Calderwood	f			G. Gibson		www.beesofcanada.com	CNC
Macropis	nuda	New Brunswick	St. John	45.2729	-66.0632	7	July	1901	A.G. Leavitt	f			R.R. Snelling		www.beesofcanada.com	CNC
Macropis	nuda	New Brunswick	St. John	45.2729	-66.0632	9	August	1902	A.G. Leavitt	f			R.R. Snelling		www.beesofcanada.com	CNC
Macropis	nuda	New Brunswick	St. John	45.2729	-66.0632	26	July	1902	A.G. Leavitt	m			R.R. Snelling		www.beesofcanada.com	CNC
Macropis	nuda	New Brunswick	St. John	45.2729	-66.0632	24	July	1902	A.G. Leavitt	m			R.R. Snelling		www.beesofcanada.com	CNC
Macropis	nuda	New Brunswick	St. John	45.2729	-66.0632	7	August	1900	A.G. Leavitt	m			R.R. Snelling		www.beesofcanada.com	CNC
Macropis	nuda	Nova Scotia	Halifax Co.	44.9	-63.1	30	July	1930	?	m					www.beesofcanada.com	CNC
Macropis	nuda	Nova Scotia	Kings Co.	45	-64.6	15	July	1931	C.E. Atwood	f			Atwood		www.beesofcanada.com	CNC
Macropis	nuda	Ontario	Beverly Swamp, Wentworth Co.	43.3	-80.1667	28	July	1966	D. Davies: S.B. Lail	f			T. Romankova 2001		www.beesofcanada.com	CNC
Macropis	nuda	Ontario	Bothwell	42.6309	-81.8708	30	June	1962	S.M. Clark	m			R.R. Snelling		www.beesofcanada.com	CNC
Macropis	nuda	Ontario	Fitzroy (Hb (?) 46 (?))	45.4687	-76.2076	11	July	1938	O. Peck	m			R.R. Snelling		www.beesofcanada.com	CNC
Macropis	nuda	Ontario	Fitzroy (Hb (?) 46 (?))	45.4687	-76.2076	11	July	1938	O. Peck	m			R.R. Snelling		www.beesofcanada.com	CNC
Macropis	nuda	Ontario	Go Home Bay	44.9984	-79.9325	11	July	1932	G.S. Walley	m			R.R. Snelling		www.beesofcanada.com	CNC
Macropis	nuda	New Brunswick	Kouchibouguac N.P.	46.8065	-64.9654	25	July	1977	S.J. Miller	m			G. Gibson		www.beesofcanada.com	CNC
Macropis	nuda	Ontario	One Sided Lake	49.0603	-93.8947	2	July	1960	S.M. Clark	m			T. Romankova 2001		www.beesofcanada.com	CNC
Macropis	nuda	Ontario	Orillia	44.6095	-79.4207	26	July	1924	H.L. Viereck	f			R.R. Snelling		www.beesofcanada.com	CNC
Macropis	nuda	Ontario	Orillia	44.6095	-79.4207	26	July	1924	H.L. Viereck	f			R.R. Snelling		www.beesofcanada.com	CNC
Macropis	nuda	Ontario	Orillia	44.6095	-79.4207	28	July	1924	H.L. Viereck	f			R.R. Snelling		www.beesofcanada.com	CNC
Macropis	nuda	Ontario	Orillia	44.6095	-79.4207	30	July	1924	H.L. Viereck	f			T. Romankova 2001		www.beesofcanada.com	CNC
Macropis	nuda	Ontario	St. Lawrence Is. Nat. Park	44.4084	-75.8768	8	July	1975	E. Sigler	f		malaise trap	T. Romankova 2001		www.beesofcanada.com	CNC
Macropis	nuda	Ontario	St. Lawrence Is. Nat. Park	44.4084	-75.8768	11	July	1975	R.J. McMillan	f		malaise trap	T. Romankova 2001		www.beesofcanada.com	CNC
Macropis	nuda	Ontario	St. Lawrence Is. Nat. Park	44.4084	-75.8768	11	July	1975	R.J. McMillan	f		malaise trap	T. Romankova 2001		www.beesofcanada.com	CNC
Macropis	nuda	Ontario	St. Lawrence Is. Nat. Park	44.4084	-75.8768	11	July	1975	R.J. McMillan	f		malaise trap	T. Romankova 2001		www.beesofcanada.com	CNC
Macropis	nuda	Ontario	St. Lawrence Is. Nat. Park	44.4084	-75.8768	11	July	1975	R.J. McMillan	f		malaise trap	T. Romankova 2001		www.beesofcanada.com	CNC
Macropis	nuda	Ontario	St. Lawrence Is. Nat. Park	44.4084	-75.8768	7	July	1975	R.J. McMillan	f		malaise trap	T. Romankova 2001		www.beesofcanada.com	CNC
Macropis	nuda	Ontario	St. Lawrence Is. Nat. Park	44.4084	-75.8768	7	July	1975	R.J. McMillan	f		malaise trap	T. Romankova 2001		www.beesofcanada.com	CNC
Macropis	nuda	Ontario	St. Lawrence Is. Nat. Park	44.4084	-75.8768	7	July	1975	R.J. McMillan	f		malaise trap	T. Romankova 2001		www.beesofcanada.com	CNC
Macropis	nuda	Ontario	St. Lawrence Is. Nat. Park	44.4084	-75.8768	16	July	1975	R.J. McMillan	f		malaise trap	T. Romankova 2001		www.beesofcanada.com	CNC
Macropis	nuda	Ontario	St. Lawrence Is. Nat. Park	44.4084	-75.8768	16	July	1975	R.J. McMillan	f		malaise trap	T. Romankova 2001		www.beesofcanada.com	CNC
Macropis	nuda	Ontario	St. Lawrence Is. Nat. Park	44.4084	-75.8768	16	July	1975	E. Sigler	f		malaise trap	T. Romankova 2001		www.beesofcanada.com	CNC
Macropis	nuda	Ontario	St. Lawrence Is. Nat. Park	44.4084	-75.8768	8	July	1975	E. Sigler	f		malaise trap	T. Romankova 2001		www.beesofcanada.com	CNC
Macropis	nuda	Ontario	St. Lawrence Is. Nat. Park	44.4084	-75.8768	8	July	1975	E. Sigler	f		malaise trap	T. Romankova 2001		www.beesofcanada.com	CNC
Macropis	nuda	Ontario	St. Lawrence Is. Nat. Park	44.4084	-75.8768	8	July	1975	E. Sigler	f		malaise trap	T. Romankova 2001		www.beesofcanada.com	CNC
Macropis	nuda	Ontario	St. Lawrence Is. Nat. Park	44.4084	-75.8768	8	July	1975	E. Sigler	f		malaise trap	T. Romankova 2001		www.beesofcanada.com	CNC
Macropis	nuda	Ontario	St. Lawrence Is. Nat. Park	44.4084	-75.8768	11	July	1975	R.J. McMillan	f		malaise trap	T. Romankova 2001		www.beesofcanada.com	CNC
Macropis	nuda	Ontario	St. Lawrence Is. Nat. Park	44.4084	-75.8768	16	July	1975	R.J. McMillan	f		malaise trap	T. Romankova 2001		www.beesofcanada.com	CNC
Macropis	nuda	Ontario	St. Lawrence Is. Nat. Park	44.4084	-75.8768	16	July	1975	R.J. McMillan	f		malaise trap	T. Romankova 2001		www.beesofcanada.com	CNC
Macropis	nuda	Ontario	St. Lawrence Is. Nat. Park	44.4084	-75.8768	7	July	1975	R.J. McMillan	f		malaise trap	T. Romankova 2001		www.beesofcanada.com	CNC
Macropis	nuda	Ontario	St. Lawrence Is. Nat. Park	44.4084	-75.8768	11	July	1975	R.J. McMillan	f		malaise trap	T. Romankova 2001		www.beesofcanada.com	CNC
Macropis	nuda	Ontario	St. Lawrence Is. Nat. Park	44.4084	-75.8768	11	July	1975	R.J. McMillan	f		malaise trap	T. Romankova 2001		www.beesofcanada.com	CNC
Macropis	nuda	Ontario	St. Lawrence Is. Nat. Park	44.4084	-75.8768	14	July	1975	E. Sigler	f		malaise trap	T. Romankova 2001		www.beesofcanada.com	CNC
Macropis	nuda	Ontario	St. Lawrence Is. Nat. Park	44.4084	-75.8768	14	July	1975	E. Sigler	f		malaise trap	T. Romankova 2001		www.beesofcanada.com	CNC
Macropis	nuda	Ontario	St. Lawrence Is. Nat. Park	44.4084	-75.8768	14	July	1975	E. Sigler	f		malaise trap	T. Romankova 2001		www.beesofcanada.com	CNC
Macropis	nuda	Ontario	St. Lawrence Is. Nat. Park	44.4084	-75.8768	21	July	1975	E. Sigler	f		malaise trap	T. Romankova 2001		www.beesofcanada.com	CNC
Macropis	nuda	Ontario	St. Lawrence Is. Nat. Park	44.4084	-75.8768	14	July	1975	E. Sigler	f		malaise trap	T. Romankova 2001		www.beesofcanada.com	CNC
Macropis	nuda	Ontario	St. Lawrence Is. Nat. Park	44.4084	-75.8768	14	July	1975	E. Sigler	m		malaise trap	T. Romankova 2001		www.beesofcanada.com	CNC
Macropis	nuda	Ontario	St. Lawrence Is. Nat. Park	44.4084	-75.8768	16	July	1975	E. Sigler	m		malaise trap	T. Romankova 2001		www.beesofcanada.com	CNC
Macropis	nuda	Ontario	St. Lawrence Is. Nat. Park	44.4084	-75.8768	16	July	1975	R.J. McMillan	m		malaise trap	T. Romankova 2001		www.beesofcanada.com	CNC
Macropis	nuda	Ontario	St. Lawrence Is. Nat. Park	44.4084	-75.8768	20	July	1976	W. Reid	f			G. Gibson		www.beesofcanada.com	CNC
Macropis	nuda	Ontario	St. Lawrence Is. Nat. Park	44.4084	-75.8768	20	July	1976	W. Reid	f			T. Romankova 2001		www.beesofcanada.com	CNC
Macropis	nuda	Ontario	St. Lawrence Is. Nat. Park	44.4084	-75.8768	16	July	1975	E. Sigler	f			T. Romankova 2001		www.beesofcanada.com	CNC
Macropis	nuda	Ontario	St. Lawrence Is. Nat. Park	44.4084	-75.8768	16	July	1975	E. Sigler	f			T. Romankova 2001		www.beesofcanada.com	CNC
Macropis	nuda	Ontario	St. Lawrence Is. Nat. Park	44.4084	-75.8768	20	July	1976	W. Reid	f			T. Romankova 2001		www.beesofcanada.com	CNC
Macropis	nuda	Ontario	St. Lawrence Is. Nat. Park	44.4084	-75.8768	2-9	July	1975	E. Sigler	m			T. Romankova 2001		www.beesofcanada.com	CNC
Macropis	nuda	Ontario	St. Lawrence Is. Nat. Park	44.4084	-75.8768	2	July	1975	E. Sigler	m			T. Romankova 2001		www.beesofcanada.com	CNC
Macropis	nuda	Ontario	St. Lawrence Is. Nat. Park	44.4084	-75.8768	2	July	1975	E. Sigler	m			T. Romankova 2001		www.beesofcanada.com	CNC
Macropis	nuda	Ontario	St. Lawrence Is. Nat. Park	44.4084	-75.8768	2	July	1975	E. Sigler	m			T. Romankova 2001		www.beesofcanada.com	CNC
Macropis	nuda	Ontario	St. Lawrence Is. Nat. Park	44.4084	-75.8768	2	July	1975	E. Sigler	m			T. Romankova 2001		www.beesofcanada.com	CNC
Macropis	nuda	Ontario	St. Lawrence Is. Nat. Park	44.4084	-75.8768	2	July	1975	E. Sigler	m			T. Romankova 2001		www.beesofcanada.com	CNC
Macropis	nuda	Ontario	St. Lawrence Is. Nat. Park	44.4084	-75.8768	2	July	1975	E. Sigler	m			T. Romankova 2001		www.beesofcanada.com	CNC
Macropis	nuda	Ontario	St. Lawrence Is. Nat. Park	44.4084	-75.8768	2	July	1975	E. Sigler	m			C. Sheffield 2008		www.beesofcanada.com	CNC
Macropis	nuda	Ontario	St. Lawrence Is. Nat. Park	44.4084	-75.8768	14	July	1976	W. Reid	m			C. Sheffield 2008		www.beesofcanada.com	CNC
Macropis	nuda	Ontario	St. Lawrence Is. Nat. Park	44.4084	-75.8768	2	July	1975	E. Sigler	m			C. Sheffield 2008		www.beesofcanada.com	CNC
Macropis	nuda	Ontario	St. Lawrence Is. Nat. Park	44.4084	-75.8768	2	July	1975	E. Sigler	m			C. Sheffield 2008		www.beesofcanada.com	CNC
Macropis	nuda	Ontario	St. Lawrence Is. Nat. Park	44.4084	-75.8768	2-9	July	1975	E. Sigler	m			C. Sheffield 2008		www.beesofcanada.com	CNC
Macropis	nuda	Ontario	Strathroy	42.9555	-81.6233	2	July	1925	H.F. Hudson	m			R.R. Snelling		www.beesofcanada.com	CNC
Macropis	nuda	Ontario	Thamesville	42.5517	-81.9772	30	June	1962	S.M. Clark	m			R.R. Snelling		www.beesofcanada.com	CNC
Macropis	nuda	Ontario	Toronto	43.6702	-79.3868	22	July	1891	?	f			R.R. Snelling		www.beesofcanada.com	CNC
Macropis	nuda	Ontario	Toronto	43.6702	-79.3868	11	July	1891	?	f			R.R. Snelling		www.beesofcanada.com	CNC
Macropis	nuda	Ontario	Toronto	43.6702	-79.3868	21	July	1892	?	f			R.R. Snelling		www.beesofcanada.com	CNC
Macropis	nuda	Ontario	Toronto	43.6702	-79.3868	2	August	1891	?	f			R.R. Snelling		www.beesofcanada.com	CNC
Macropis	nuda	Ontario	Toronto	43.6702	-79.3868	12	July	1891	?	f			R.R. Snelling		www.beesofcanada.com	CNC
Macropis	nuda	Ontario	Toronto	43.6702	-79.3868	28	July	1891	?	f			R.R. Snelling		www.beesofcanada.com	CNC
Macropis	nuda	Ontario	Toronto	43.6702	-79.3868	5	July	1891	?	f			R.R. Snelling		www.beesofcanada.com	CNC
Macropis	nuda	Ontario	Toronto	43.6702	-79.3868	26	July	1890	?	m			R.R. Snelling		www.beesofcanada.com	CNC
Macropis	nuda	Ontario	Toronto	43.6702	-79.3868	1	July	1889	?	m			R.R. Snelling		www.beesofcanada.com	CNC
Macropis	nuda	Ontario	Toronto	43.6702	-79.3868	1	July	1889	?	m		Old Det: morsei	R.R. Snelling		www.beesofcanada.com	CNC
Macropis	nuda	Ontario	Toronto	43.6702	-79.3868	19	July	1891	?	m			R.R. Snelling		www.beesofcanada.com	CNC
Macropis	nuda	Ontario	Toronto	43.6702	-79.3868	14	July	1893	?	m			R.R. Snelling		www.beesofcanada.com	CNC
Macropis	nuda	Quebec	Aylmer	45.4002	-75.8064	21	June	1915	F.W.L. Sladen	f			R.R. Snelling		www.beesofcanada.com	CNC
Macropis	nuda	Quebec	Aylmer	45.4002	-75.8064	21	June	1915	F.W.L. Sladen	f			R.R. Snelling		www.beesofcanada.com	CNC
Macropis	nuda	Quebec	Aylmer	45.4002	-75.8064	20	August	1924	H.L. Viereck	f			R.R. Snelling		www.beesofcanada.com	CNC
Macropis	nuda	Quebec	Aylmer	45.4002	-75.8064	21	June	1915	F.W.L. Sladen	m			R.R. Snelling		www.beesofcanada.com	CNC
Macropis	nuda	Quebec	Ft. Coulonge	45.8415	-76.7383	7	July	1917	J.I. Beaulne	m			R.R. Snelling		www.beesofcanada.com	CNC
Macropis	nuda	Quebec	Hull	45.4476	-75.7332	8	July	1923	H.L. Viereck	f			R.R. Snelling		www.beesofcanada.com	CNC
Macropis	nuda	Quebec	Hull	45.4476	-75.7332	8	July	1923	H.L. Viereck	f			R.R. Snelling		www.beesofcanada.com	CNC
Macropis	nuda	Quebec	Hull	45.4476	-75.7332	1	July	1914	F.W.L. Sladen	m			C. Sheffield 2008		www.beesofcanada.com	CNC
Macropis	nuda	Quebec	Hull	45.4476	-75.7332	8	July	1928	H.L. Viereck	m		Old Det: Steironema	C. Sheffield 2008		www.beesofcanada.com	CNC
Macropis	nuda	Quebec	Kazabazua	45.952	-76.0217	17	July	1913	F.W.L. Sladen	f			R.R. Snelling		www.beesofcanada.com	CNC
Macropis	nuda	Quebec	Kazabazua	45.952	-76.0217	3	July	1913	F.W.L. Sladen	f			R.R. Snelling		www.beesofcanada.com	CNC
Macropis	nuda	Quebec	Kazabazua	45.952	-76.0217	3	July	1913	F.W.L. Sladen	f			R.R. Snelling		www.beesofcanada.com	CNC
Macropis	nuda	Quebec	Kazabazua	45.952	-76.0217	3	July	1913	F.W.L. Sladen	f			R.R. Snelling		www.beesofcanada.com	CNC
Macropis	nuda	Quebec	Kazabazua	45.952	-76.0217	3	July	1913	F.W.L. Sladen	f			R.R. Snelling		www.beesofcanada.com	CNC
Macropis	nuda	Quebec	Kazabazua	45.952	-76.0217	3	July	1913	F.W.L. Sladen	f			R.R. Snelling		www.beesofcanada.com	CNC
Macropis	nuda	Quebec	Kazabazua	45.952	-76.0217	3	July	1913	F.W.L. Sladen	f			R.R. Snelling		www.beesofcanada.com	CNC
Macropis	nuda	Quebec	Kazabazua	45.952	-76.0217	3	July	1913	F.W.L. Sladen	m			R.R. Snelling		www.beesofcanada.com	CNC
Macropis	nuda	Quebec	Kazabazua	45.952	-76.0217	3	July	1913	F.W.L. Sladen	m			R.R. Snelling		www.beesofcanada.com	CNC
Macropis	nuda	Saskatchewan	Katepwa L.	50.735	-103.681	20	July	1925	J.J. deGryse	m			R.R. Snelling		www.beesofcanada.com	CNC
Macropis	nuda	Saskatchewan	Saskatoon	52.1293	-106.67	2	August	1923	N.J. Atkinson	f			R.R. Snelling		www.beesofcanada.com	CNC
Macropis	nuda	Saskatchewan	Saskatoon	52.1293	-106.67	25	July	1923	Kenneth M. King	m		Old Det: morsei	R.R. Snelling		www.beesofcanada.com	CNC
Macropis	nuda	Saskatchewan	Willow Bunch	49.392	-105.637	28	July	1955	C.D. Miller	m			R.R. Snelling		www.beesofcanada.com	CNC
Macropis	nuda	Saskatchewan	Willow Bunch	49.392	-105.637	29	July	1955	C.D. Miller	m			R.R. Snelling		www.beesofcanada.com	CNC
Macropis	nuda	Quebec	Chicoutimi	48.4278	-71.0592			1882								Provancher 1882
Macropis	nuda	Nova Scotia	near Middleton	44.9665	-65.056			2002	C. Sheffield
Macropis	nuda	Quebec	Chicoutimi	48.4277	-71.0591								Provancher			Provancher 1882
Macropis	ciliata	Quebec	Cap Rouge	46.75	-71.35								Provancher			Provancher 1888
Macropis	ciliata	New Brunswick	Little River	46.5	-66.8	11	7	1978					W.E. LaBerge
